# Supplementary material for: Interfacial assembly of amphiphilic styrylquinoxalines: alkyl chain length tunable topochemical reactions and supramolecular chirality
Source: Royal Society of Chemistry journal article supplement (doi:10.1039/c3cp50384d), 2013-01-01
Supplement: c3cp50384d.pdf [file c3cp50384d.pdf]

### Electronic Supplementary Information

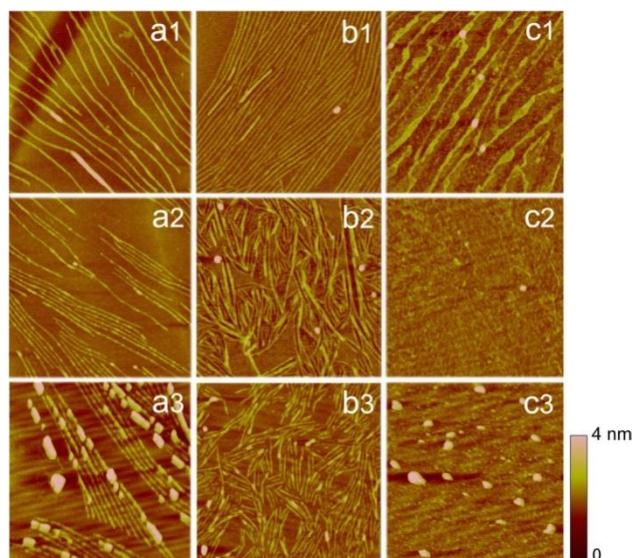

**Figure S1.** AFM images of SQC14 (a), SQC16 (b) and SQC18 (c) monolayer LB films deposited from water subphase onto mica at the surface pressure of 5 mN/m (a1, b1, c1) and 30 mN/m (a2, b2, c2), as well as of these films at 30 mN/m after photo-irradiation under 365nm for 1 h (a3, b3, c3). The scan scale is 1 μm.
